# Supplementary material
Source: MDPI journal article supplement (https://www.mdpi.com/2673-3994/3/1/10)
Supplement: s1 [file s1]

## Supplementary Materials

**Table S1.** ANOVA for response surface quadratic model of bulk density as affected by temperature and residence time of torrefaction treatment.

| Source             | Sum of Squares | df | Mean Square | F Value | p-value |                 |
|--------------------|----------------|----|-------------|---------|---------|-----------------|
| Model              | 572.45         | 5  | 114.49      | 2.34    | 0.15    | not significant |
| A-Temperature (°C) | 54.36          | 1  | 54.36       | 1.11    | 0.33    |                 |
| B-Time (min)       | 134.81         | 1  | 134.81      | 2.76    | 0.14    |                 |
| AB                 | 4.16           | 1  | 4.16        | 0.09    | 0.78    |                 |
| A <sup>2</sup>     | 124.61         | 1  | 124.61      | 2.55    | 0.15    |                 |
| B <sup>2</sup>     | 110.21         | 1  | 110.21      | 2.25    | 0.18    |                 |
| Residual           | 342.33         | 7  | 48.90       |         |         |                 |
| Lack of Fit        | 163.95         | 3  | 54.65       | 1.23    | 0.41    | not significant |

**Table S2.** ANOVA for response surface quadratic model of particle density as affected by temperature and residence time of torrefaction treatment.

| Source             | Sum of Squares | df | Mean Square | F Value | p-value |                 |
|--------------------|----------------|----|-------------|---------|---------|-----------------|
| Model              | 5704.95        | 5  | 1140.99     | 4.16    | 0.04    | significant     |
| A-Temperature (°C) | 2200.34        | 1  | 2200.34     | 8.02    | 0.03    |                 |
| B-Time (min)       | 105.84         | 1  | 105.84      | 0.39    | 0.55    |                 |
| AB                 | 345.96         | 1  | 345.96      | 1.26    | 0.30    |                 |
| A <sup>2</sup>     | 3014.95        | 1  | 3014.95     | 11.00   | 0.01    |                 |
| B <sup>2</sup>     | 707.96         | 1  | 707.96      | 2.58    | 0.15    |                 |
| Residual           | 1919.41        | 7  | 274.20      |         |         |                 |
| Lack of Fit        | 708.54         | 3  | 236.18      | 0.78    | 0.56    | not significant |

**Table S3.** ANOVA for Response Surface Quadratic Model of pellet density as affected by temperature and residence time of torrefaction treatment.

| Source         | Sum of Squares | df | Mean Square | F Value | p-value  |                 |
|----------------|----------------|----|-------------|---------|----------|-----------------|
| Model          | 7424.86        | 5  | 1484.97     | 18.60   | 0.00     | significant     |
| A-Temperature  | 5927.70        | 1  | 5927.70     | 74.24   | < 0.0001 |                 |
| B-Time         | 0.03           | 1  | 0.03        | 0.00    | 0.98     |                 |
| AB             | 287.47         | 1  | 287.47      | 3.60    | 0.10     |                 |
| A <sup>2</sup> | 1115.59        | 1  | 1115.59     | 13.97   | 0.01     |                 |
| B <sup>2</sup> | 470.52         | 1  | 470.52      | 5.89    | 0.05     |                 |
| Residual       | 558.93         | 7  | 79.85       |         |          |                 |
| Lack of Fit    | 266.27         | 3  | 88.76       | 1.21    | 0.41     | not significant |

**Table S4.** ANOVA for Response Surface Quadratic Model of tensile strength as affected by temperature and residence time of torrefaction treatment.

| Source         | Sum of Squares | df | Mean Square | F Value | p-value |                 |
|----------------|----------------|----|-------------|---------|---------|-----------------|
| Model          | 0.02           | 5  | 0.00        | 8.31    | 0.01    | significant     |
| A-Temperature  | 0.01           | 1  | 0.01        | 32.56   | 0.00    |                 |
| B-Time         | 0.00           | 1  | 0.00        | 0.18    | 0.69    |                 |
| AB             | 0.00           | 1  | 0.00        | 3.28    | 0.11    |                 |
| A <sup>2</sup> | 0.00           | 1  | 0.00        | 4.37    | 0.07    |                 |
| B <sup>2</sup> | 0.00           | 1  | 0.00        | 3.17    | 0.12    |                 |
| Residual       | 0.00           | 7  | 0.00        |         |         |                 |
| Lack of Fit    | 0.00           | 3  | 0.00        | 0.84    | 0.54    | not significant |

**Table S5.** ANOVA for Response Surface Quadratic Model of dimensional stability as affected by temperature and residence time of torrefaction treatment.

| Source             | Sum of Squares | df | Mean Square | F Value | p-value |                 |
|--------------------|----------------|----|-------------|---------|---------|-----------------|
| Model              | 2.40           | 5  | 0.48        | 1.05    | 0.46    | not significant |
| A-Temperature (°C) | 0.69           | 1  | 0.69        | 1.50    | 0.26    |                 |
| B-Time (min)       | 0.07           | 1  | 0.07        | 0.14    | 0.72    |                 |
| AB                 | 1.07           | 1  | 1.07        | 2.34    | 0.17    |                 |
| A <sup>2</sup>     | 0.28           | 1  | 0.28        | 0.61    | 0.46    |                 |
| B <sup>2</sup>     | 0.09           | 1  | 0.09        | 0.19    | 0.67    |                 |
| Residual           | 3.21           | 7  | 0.46        |         |         |                 |
| Lack of Fit        | 0.07           | 3  | 0.02        | 0.03    | 0.99    | not significant |

**Table S6.** ANOVA for Response Surface Quadratic Model of ash content as affected by temperature and residence time of torrefaction treatment.

| Source         | Sum of Squares | df | Mean Square | F Value | p-value |                 |
|----------------|----------------|----|-------------|---------|---------|-----------------|
| Model          | 0.01           | 5  | 0.00        | 4.79    | 0.03    | significant     |
| A-Temperature  | 0.00           | 1  | 0.00        | 18.10   | 0.00    |                 |
| B-Time         | 0.00           | 1  | 0.00        | 4.01    | 0.09    |                 |
| AB             | 0.00           | 1  | 0.00        | 0.85    | 0.39    |                 |
| A <sup>2</sup> | 0.00           | 1  | 0.00        | 0.93    | 0.37    |                 |
| B <sup>2</sup> | 0.00           | 1  | 0.00        | 0.32    | 0.59    |                 |
| Residual       | 0.00           | 7  | 0.00        |         |         |                 |
| Lack of Fit    | 0.00           | 3  | 0.00        | 0.97    | 0.49    | not significant |

**Table S7.** ANOVA for response surface quadratic model of high heating value (HHV) as affected by temperature and residence time of torrefaction treatment.

| Source         | Sum of Squares | df | Mean Square | F Value | p-value  |                 |
|----------------|----------------|----|-------------|---------|----------|-----------------|
| Model          | 3.50           | 5  | 0.70        | 53.75   | < 0.0001 | significant     |
| A-Temperature  | 2.93           | 1  | 2.93        | 224.53  | < 0.0001 |                 |
| B-Time         | 0.10           | 1  | 0.10        | 7.98    | 0.03     |                 |
| AB             | 0.00           | 1  | 0.00        | 0.19    | 0.67     |                 |
| A <sup>2</sup> | 0.38           | 1  | 0.38        | 29.37   | 0.00     |                 |
| B <sup>2</sup> | 0.00           | 1  | 0.00        | 0.10    | 0.76     |                 |
| Residual       | 0.09           | 7  | 0.01        |         |          | not significant |
| Lack of Fit    | 0.07           | 3  | 0.02        | 3.46    | 0.13     |                 |

**Table S8.** Optimal treatment conditions and equations for optimized response variables and values.

| Variable                              | Value/Equation                                           | R <sup>2</sup> | Optimized value     |
|---------------------------------------|----------------------------------------------------------|----------------|---------------------|
| Optimal conditions                    |                                                          |                |                     |
| (A) Temperature (°C)                  |                                                          |                | 230                 |
| (B) Time (min)                        |                                                          |                | 45                  |
| Bulk density (kg/m <sup>3</sup> )     | $330.73 - 6.01A + 9.47B - 2.04AB - 13.43A^2 - 12.63B^2$  | 0.62           | $161.10 \pm 6.99$   |
| Particle density (kg/m <sup>3</sup> ) | $1377.88 - 19.15A - 4.2B + 9.3AB - 33.03A^2 + 16.01B^2$  | 0.74           | $1366.50 \pm 16.55$ |
| Pellet density (kg/m <sup>3</sup> )   | $995.47 - 31.43A + 0.07B - 8.47AB + 20.09A^2 - 13.05B^2$ | 0.93           | $1042.50 \pm 8.93$  |
| Tensile strength (MPa)                | $0.15 - 0.04A - 0.03B - 0.01AB + 0.02A^2 - 0.02B^2$      | 0.85           | $0.21 \pm 0.01$     |
| Dimensional stability (%)             | $0.99 + 0.33A + 0.1B - 0.51AB - 0.31A^2 + 0.17B^2$       | 0.43           | $1.77 \pm 0.66$     |
| Ash content (%)                       | $0.27 + 0.02A - 0.01B + 0.007AB - 0.009A^2 + 0.005B^2$   | 0.77           | $0.22 \pm 0.01$     |
| Higher heating value (MJ/kg)          | $19.51 + 0.69A + 0.13B - 0.02AB + 0.37A^2 + 0.02B^2$     | 0.97           | $19.33 \pm 0.1$     |

**Table S9.** Normal distribution indicators of fibres.

| Sample                                 | Skewness | Kurtosis | Shapiro-wilk | P-value |
|----------------------------------------|----------|----------|--------------|---------|
| Sawdust                                | 1.49     | 1.62     | 0.79         | 0.02    |
| Torrefied at 230 °C (IT <sup>1</sup> ) | 1.76     | 3.14     | 0.76         | 0.01    |
| Torrefied at 230 °C (OT <sup>2</sup> ) | 2.00     | 4.14     | 0.71         | 0.003   |
| Torrefied at 260 °C (OT <sup>2</sup> ) | 2.21     | 5.19     | 0.67         | 0.001   |
| Torrefied at 290 °C (OT <sup>2</sup> ) | 2.23     | 5.35     | 0.71         | 0.003   |

<sup>1</sup> IT: inside temperature, <sup>2</sup> OT: outside temperature

**Table S10.** Mass and energy yield of torrefied sawdust compared to raw sawdust.

|                              | Temperature<br>(°C) | Time<br>(min) | Severity<br>factor | Mass loss<br>(%) | HHV <sup>3</sup> (dry)<br>(MJ/kg) | Mass yield<br>(%) | Energy yield<br>(%) |
|------------------------------|---------------------|---------------|--------------------|------------------|-----------------------------------|-------------------|---------------------|
| Non-treated sawdust          | -                   | -             | -                  | -                | 17.49                             | 100               | 100                 |
| Torrefied (IT <sup>1</sup> ) | 230                 | 15            | 5.00               | 10               | 17.20                             | 90                | 88.50               |
|                              | 230                 | 30            | 5.30               | 13               | 17.30                             | 87                | 86.04               |
|                              | 230                 | 45            | 5.48               | 9.7              | 17.36                             | 90.3              | 89.63               |
|                              | 260                 | 15            | 5.89               | 12.5             | 17.39                             | 87.5              | 86.98               |
|                              | 260                 | 30            | 6.19               | 17.3             | 17.66                             | 82.7              | 83.49               |
|                              | 260                 | 45            | 6.36               | 16.4             | 17.87                             | 83.6              | 85.39               |
|                              | 290                 | 15            | 6.77               | 22.1             | 18.49                             | 77.9              | 82.33               |
|                              | 290                 | 30            | 7.07               | 21.2             | 18.59                             | 78.8              | 83.73               |
|                              | 290                 | 45            | 7.25               | 21.7             | 18.56                             | 78.3              | 83.08               |
| Torrefied (OT <sup>2</sup> ) | 230                 | 45            | 5.48               | 25.9             | 20.06                             | 74.1              | 84.97               |
|                              | 260                 | 45            | 6.36               | 35.2             | 20.70                             | 64.8              | 76.70               |
|                              | 290                 | 45            | 7.25               | 52.5             | 24.27                             | 47.5              | 65.90               |

<sup>1</sup> IT: inside temperature, <sup>2</sup> OT: outside temperature, <sup>3</sup> HHV: higher heating value

**Table S11.** Thermochemical properties of raw and torrefied sawdust.

| Sample                                    | HHV <sup>3</sup><br>(dry)<br>(MJ/kg) | Proximate analysis<br>(% wt., dry) |          |      | Ultimate analysis (% wt., dry) |                |                |                |                |      |      |
|-------------------------------------------|--------------------------------------|------------------------------------|----------|------|--------------------------------|----------------|----------------|----------------|----------------|------|------|
|                                           |                                      | Fixed<br>carbon                    | Volatile | Ash  | N <sup>4</sup>                 | C <sup>5</sup> | H <sup>6</sup> | S <sup>7</sup> | O <sup>8</sup> | O/C  | H/C  |
| Sawdust                                   | 17.49                                | 17.4                               | 77.80    | 0.23 | 0.06                           | 49.25          | 6.27           | 0.02           | 44.39          | 0.90 | 0.13 |
| Torrefied at 230<br>°C (IT <sup>1</sup> ) | 17.36                                | 18.16                              | 77.17    | 0.22 | 0.07                           | 49.67          | 6.40           | 0.08           | 43.79          | 0.88 | 0.13 |
| Torrefied at 230<br>°C (OT <sup>2</sup> ) | 20.06                                | 26.63                              | 69.31    | 0.37 | 0.11                           | 53.92          | 6.16           | 0.25           | 39.56          | 0.73 | 0.11 |
| Torrefied at 260<br>°C (OT <sup>2</sup> ) | 20.7                                 | 32.50                              | 62.83    | 0.36 | 0.09                           | 54.21          | 5.74           | 0.05           | 39.91          | 0.74 | 0.11 |
| Torrefied at 290<br>°C (OT <sup>2</sup> ) | 24.27                                | 52.22                              | 41.76    | 0.55 | 0.16                           | 66.57          | 5.51           | 0.02           | 27.74          | 0.42 | 0.08 |

<sup>1</sup> IT: inside temperature, <sup>2</sup> OT: outside temperature, <sup>3</sup> HHV: higher heating value, <sup>4</sup> N: nitrogen, <sup>5</sup> C: carbon, <sup>6</sup> H: hydrogen, <sup>7</sup> S: sulphur, <sup>8</sup> O: oxygen.

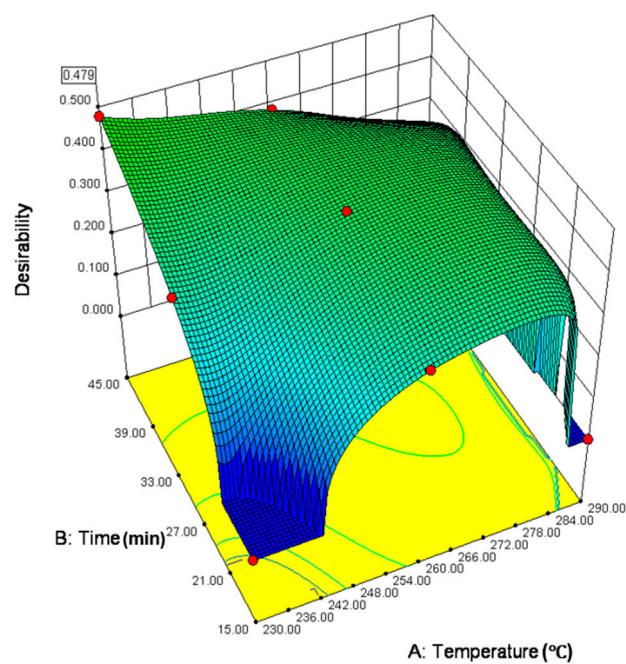

**Figure S1.** The desirability of collective responses for torrefaction treatment factors.

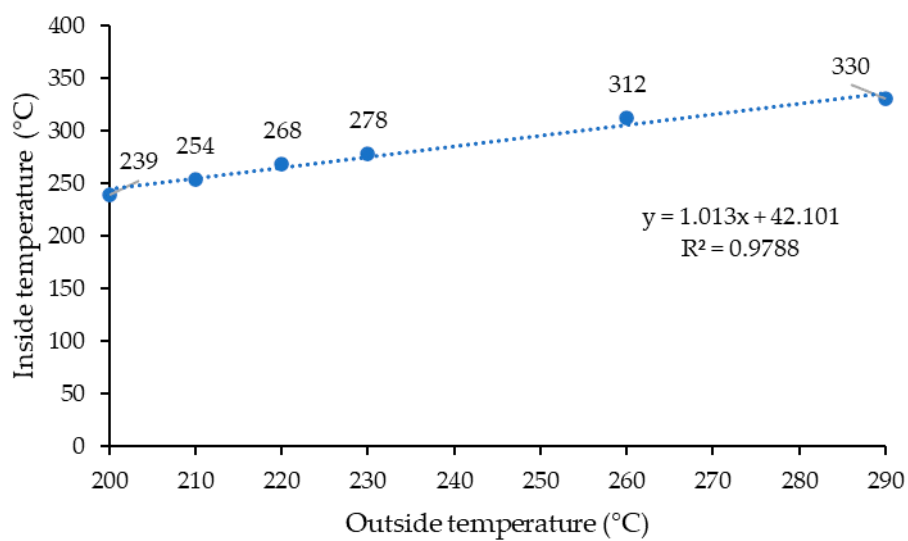

**Figure S2.** Relationship between inside and outside temperature of the batch torrefaction unit during torrefaction process.

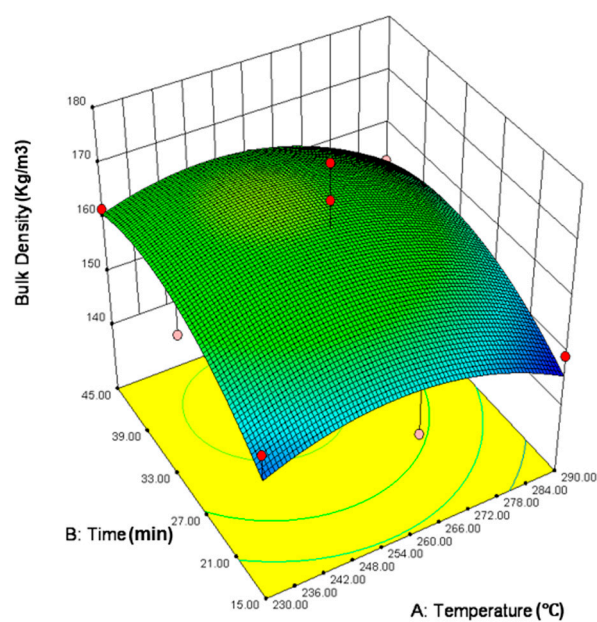

**Figure S3.** Response surface chart for bulk density of torrefied sawdust as affected by temperature and residence time of torrefaction treatment.

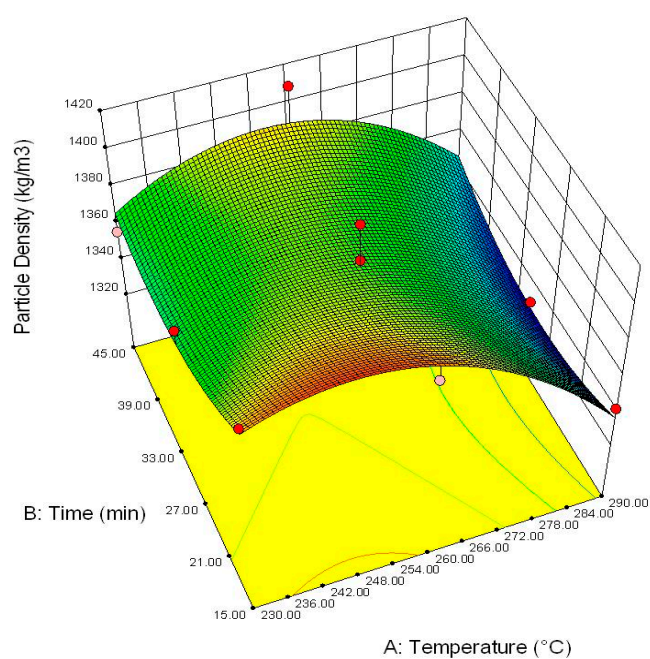

**Figure S4.** Response surface chart for particle density of torrefied sawdust as affected by temperature and residence time of torrefaction treatment.

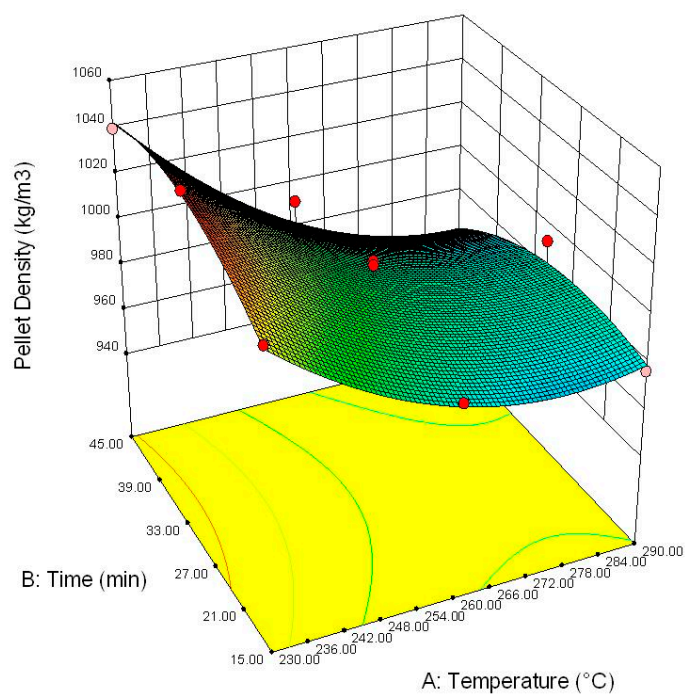

**Figure S5.** Response Surface chart for pellet density of torrefied pellets as affected by temperature and residence time of torrefaction treatment.

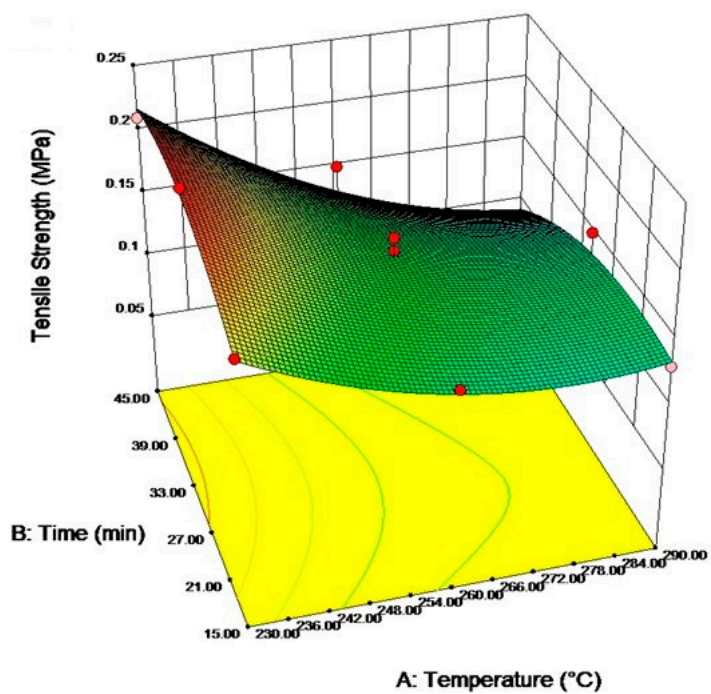

**Figure S6.** Response Surface chart for tensile strength of torrefied pellets as affected by temperature and residence time of torrefaction treatment.

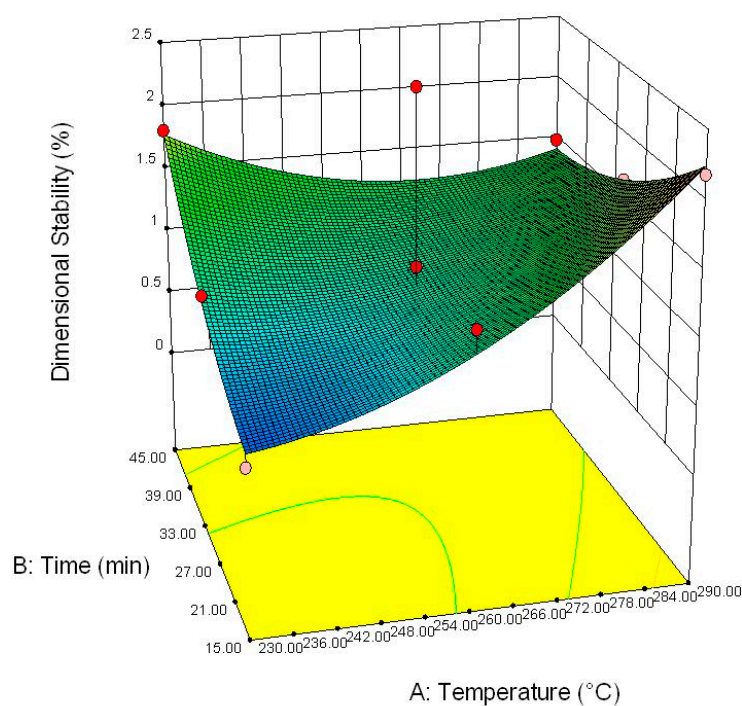

**Figure S7.** Response Surface chart for dimensional stability of torrefied pellets as affected by temperature and residence time of torrefaction treatment.

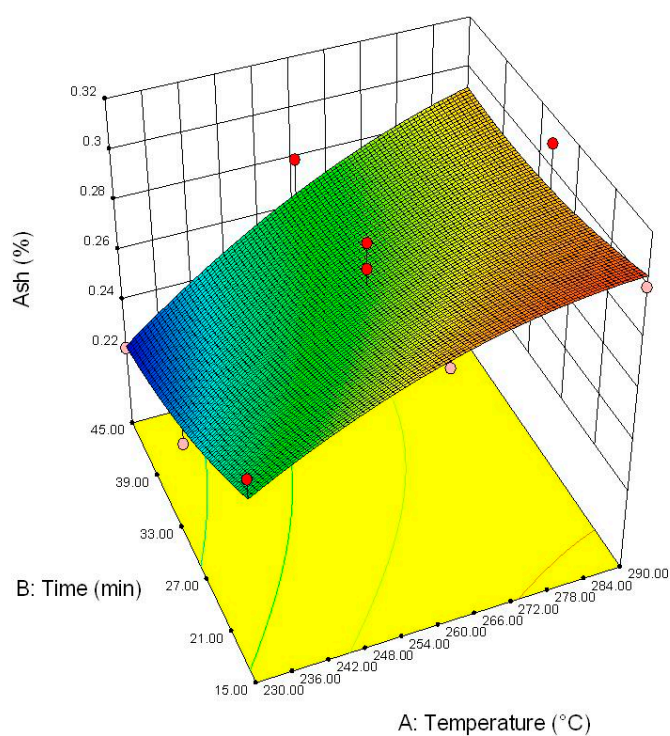

**Figure S8.** Response Surface chart for ash content of torrefied sawdust as affected by temperature and residence time of torrefaction treatment.



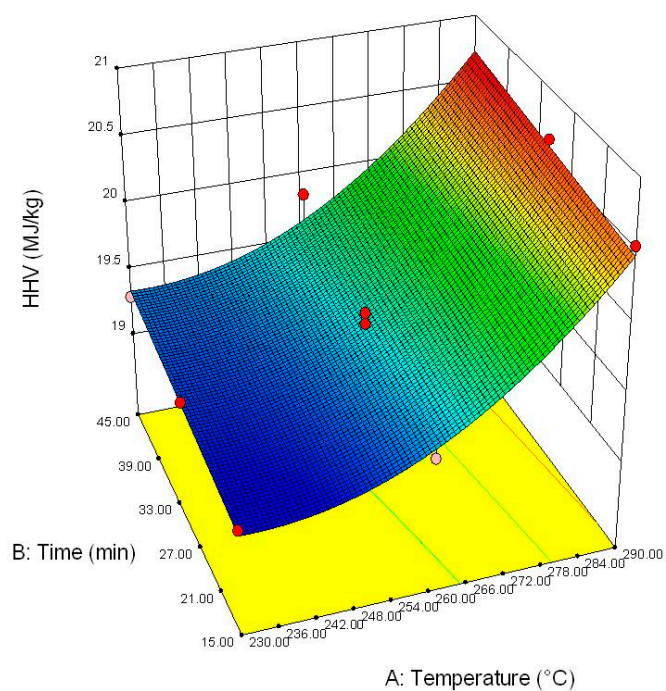

**Figure S9.** Response Surface chart for High Heating Value (HHV) of torrefied sawdust as affected by temperature and residence time of torrefaction treatment.

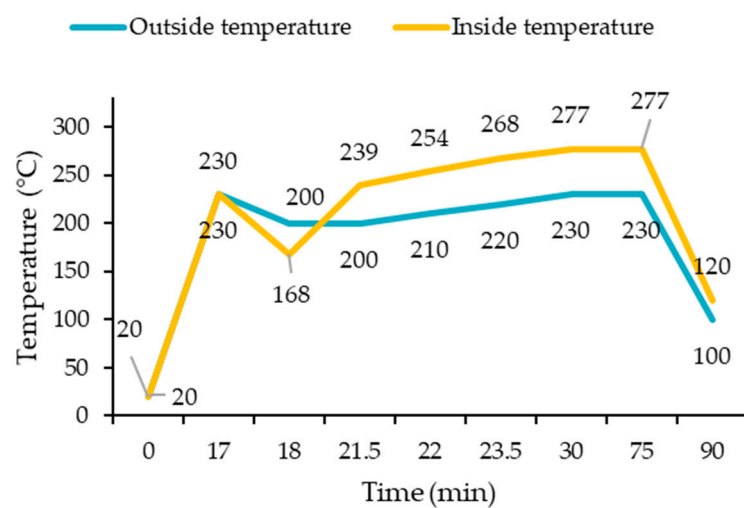

**Figure S10.** Temperature profile recorded from external and internal thermometers in BTU during sawdust torrefaction (230 °C and 45 min).

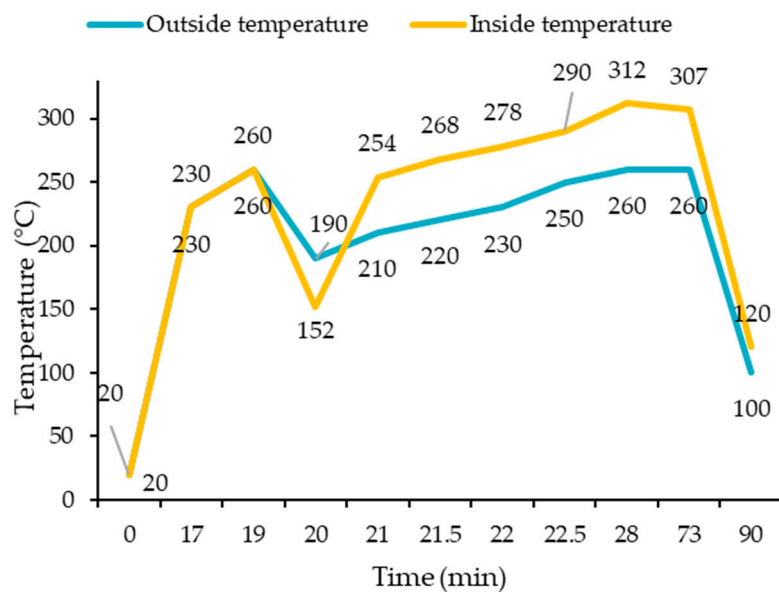

**Figure S11.** Temperature profile recorded from external and internal thermometers in BTU during sawdust torrefaction (260 °C and 45 min).

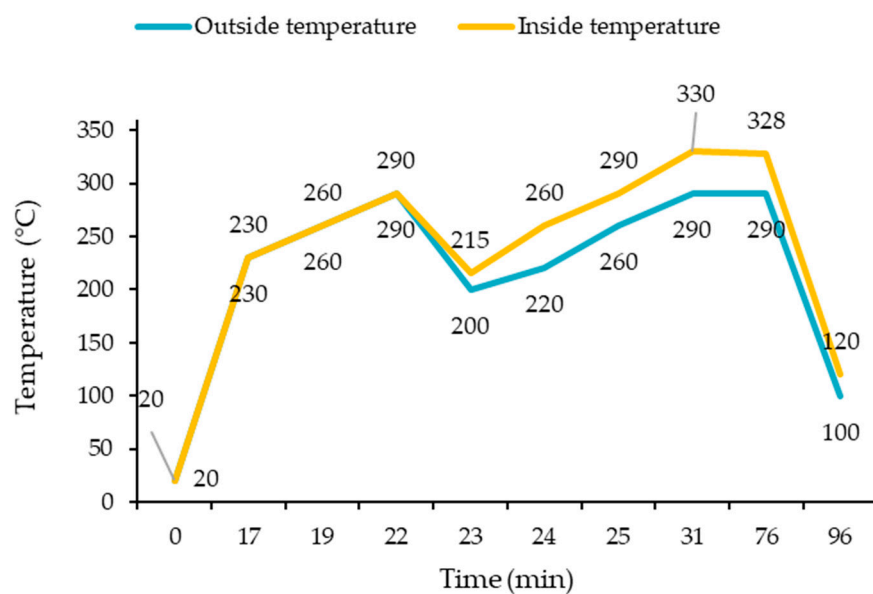

**Figure S12.** Temperature profile recorded from external and internal thermometers in BTU during sawdust torrefaction (290 °C and 45 min).
